# Supplementary material for: Cigarette smoking is a secondary cause of folliculin loss
Source: HighWire-hosted journal article supplement (doi:10.1136/thoraxjnl-2021-217197), 2022-03-17

1A

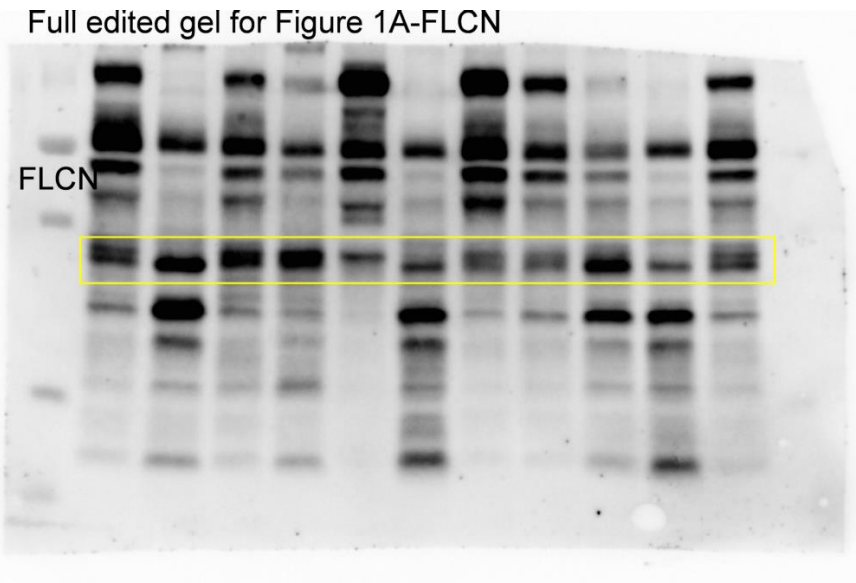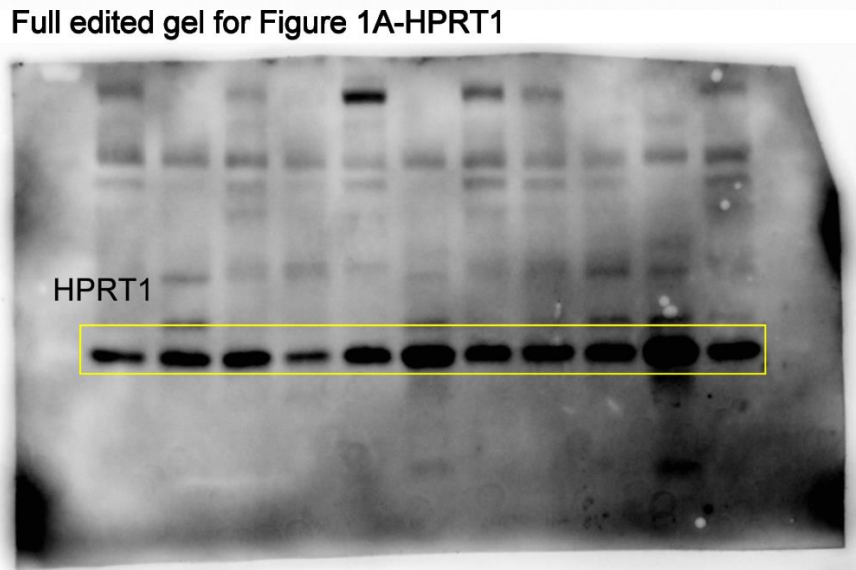

Full edited gel for Figure 2A-FLCN

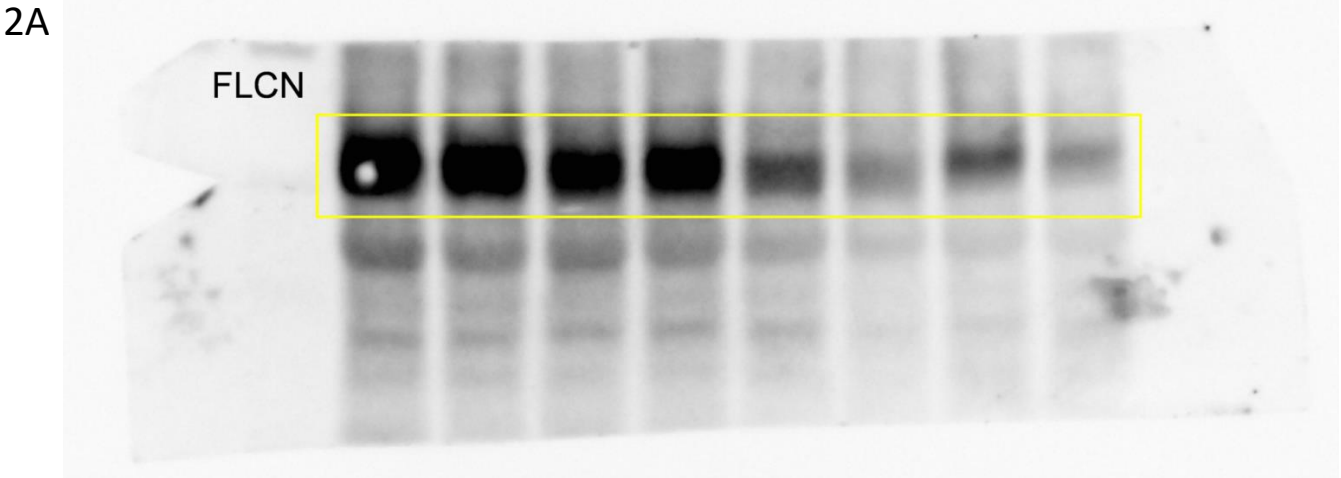

Full edited gel for Figure 2A-β-Actin

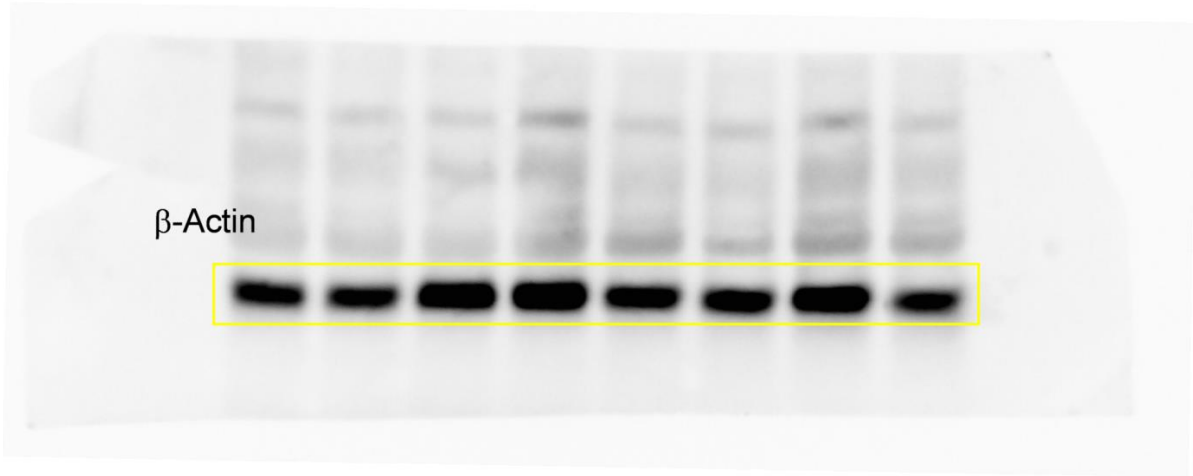

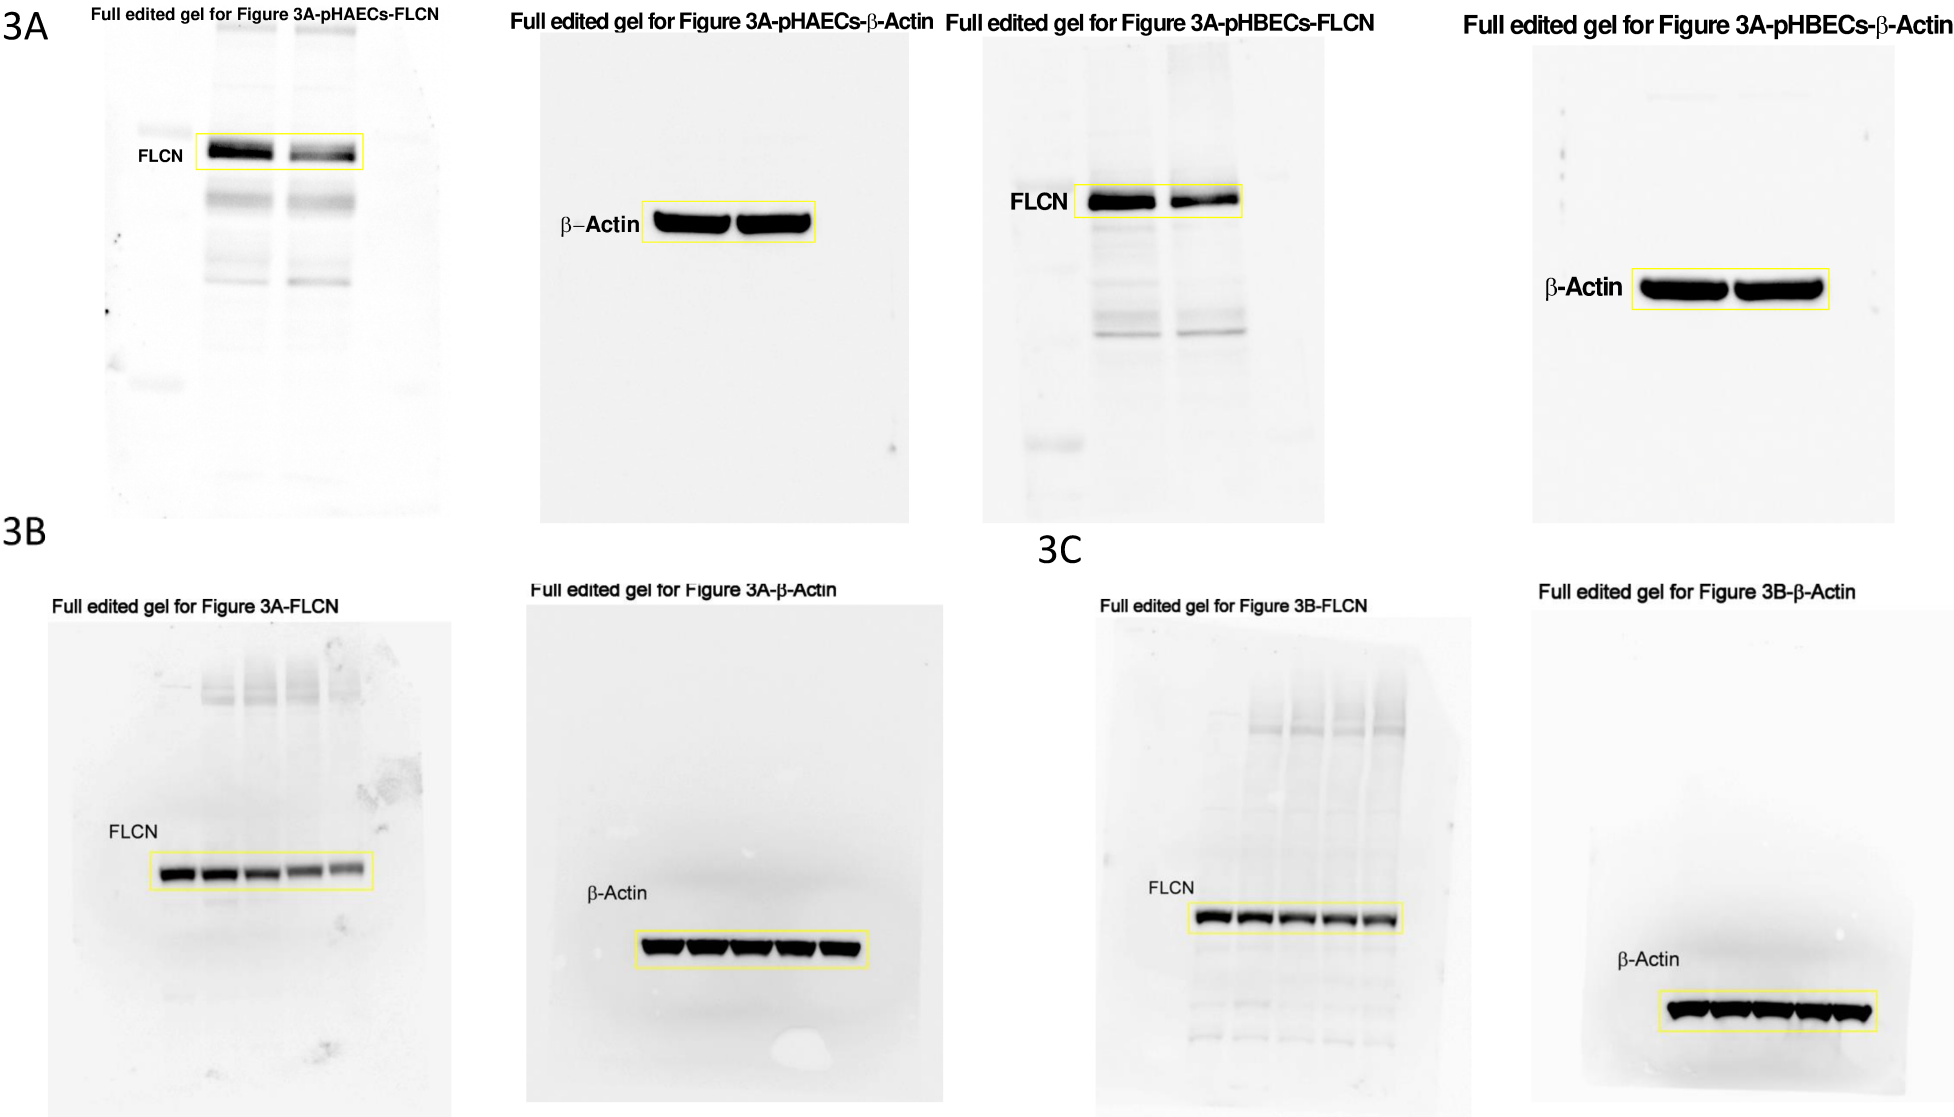

Full edited gel for Figure 3F-FLCN

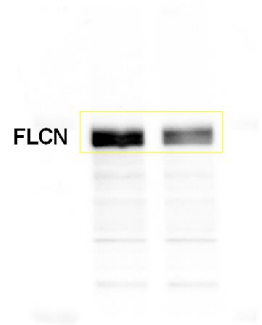

Full edited gel for Figure 3F-β-Actin

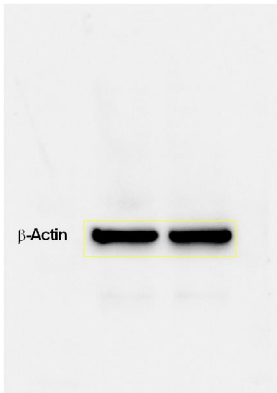

Full edited gel for Figure 3H-HA

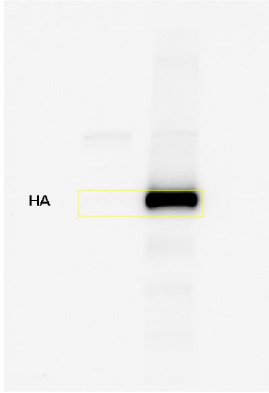

Full edited gel for Figure 3H-FLCN

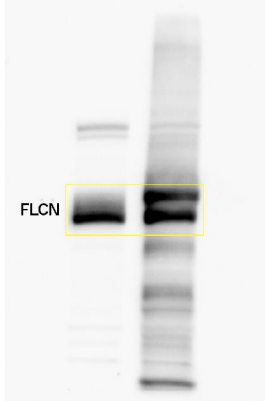

Full edited gel for Figure 3H-FLCN

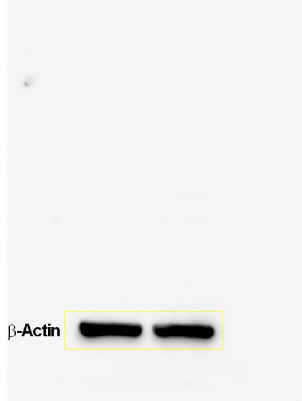

4A Full edited gel for Figure 4A-CHX-FLCN

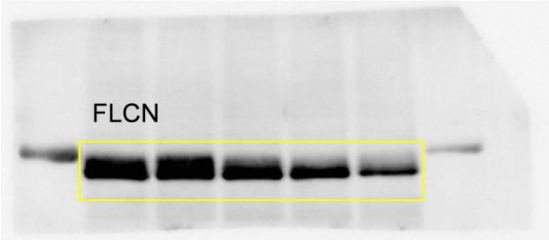

Full edited gel for Figure 4A-CHX-β-Actin

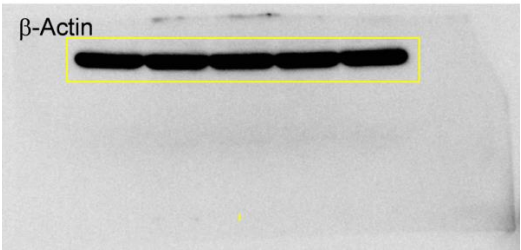

Full edited gel for Figure 4A-Leupeptin-FLCN

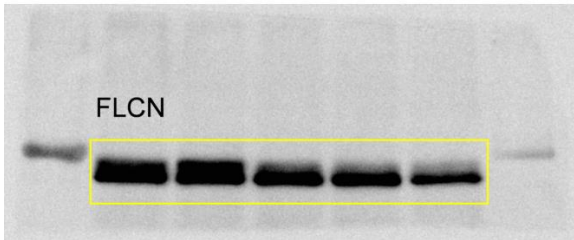

Full edited gel for Figure 4A-Leupeptin-β-Actin

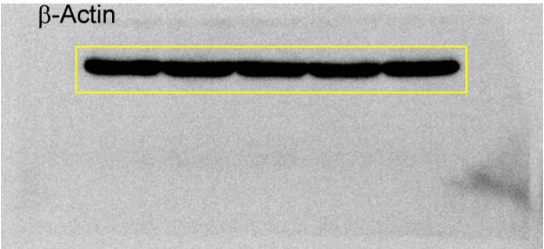

Full edited gel for Figure 4A-MG132-FLCN

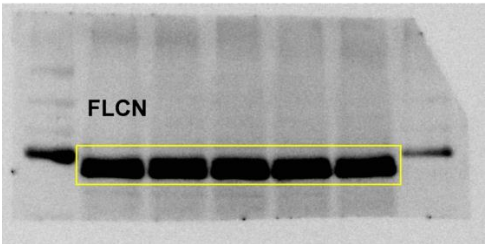

Full edited gel for Figure 4A-MG132-β-Actin

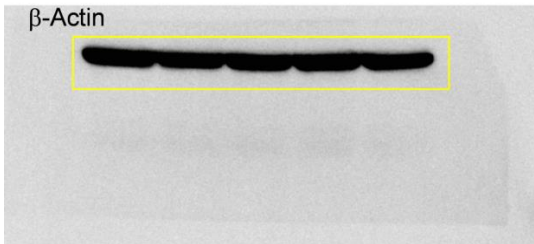

4C Full edited gel for Figure 4C-FLCN

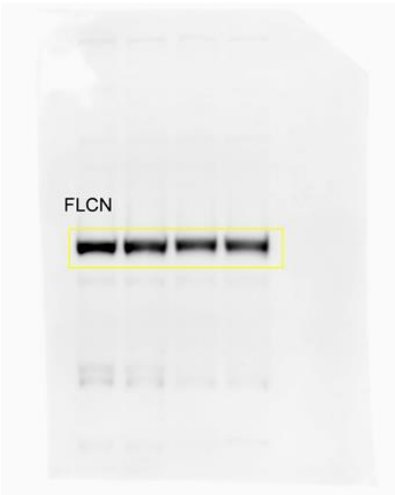

Full edited gel for Figure 4C-HA

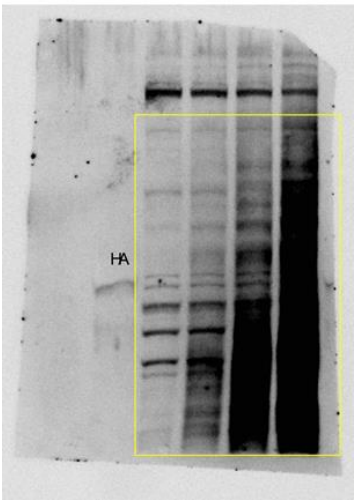

Full edited gel for Figure 4C-β-Actin

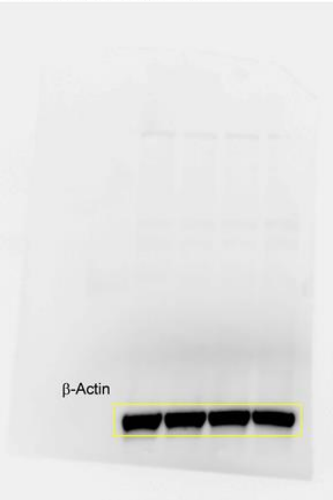

5A

Full edited gel for Figure 5A-FLCN

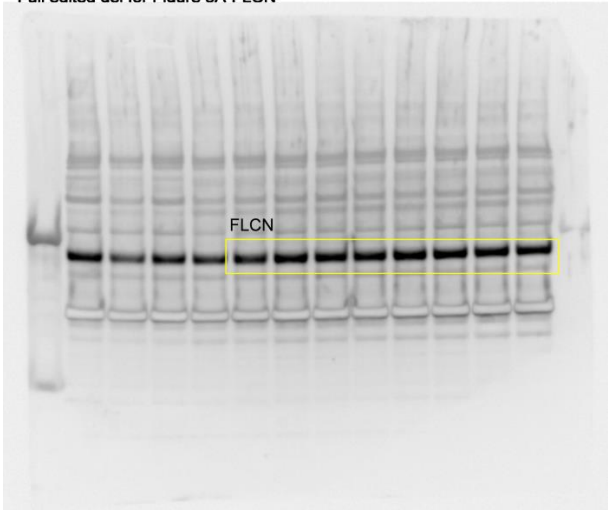

Full edited gel for Figure 5A-V5

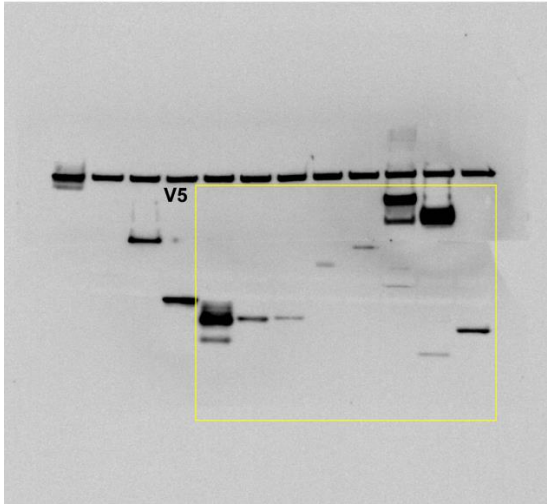

Full edited gel for Figure 5A-β-Actin

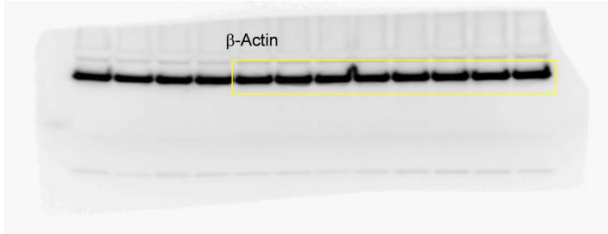

5C

Full edited gel for Figure 5B-FBXO23-FLCN

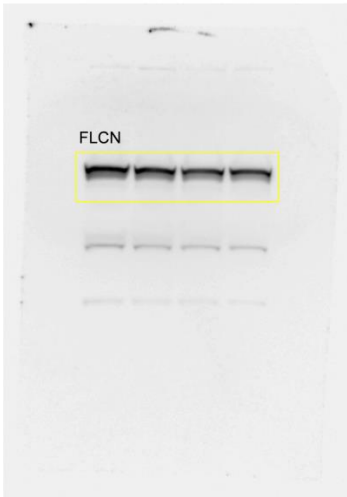

Full edited gel for Figure 5B-FBXO23-V5

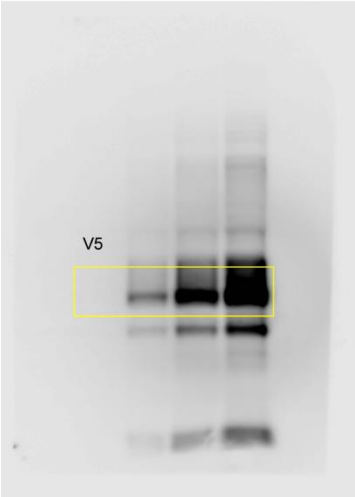

Full edited gel for Figure 5B-FBXO23-β-Actin

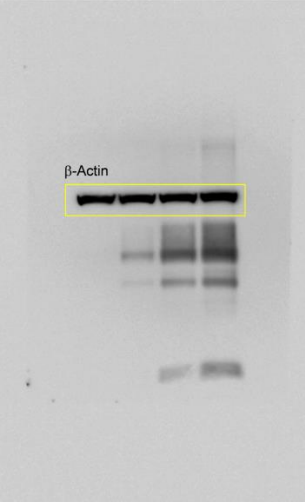

Full edited gel for Figure 5B-FBXO41-FLCN

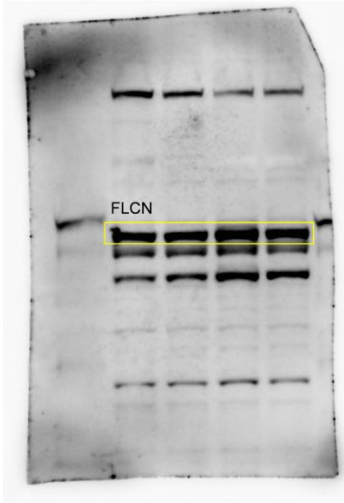

Full edited gel for Figure 5B-FBXO41-V5

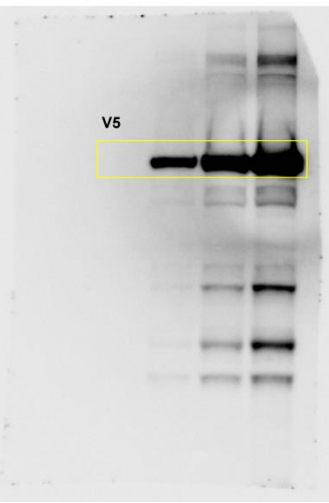

Full edited gel for Figure 5B-FBXO41-β-Actin

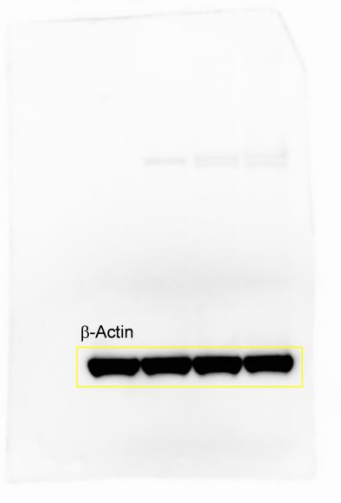

5E

Full edited gel for Figure 5E-o23 IP-FLCN

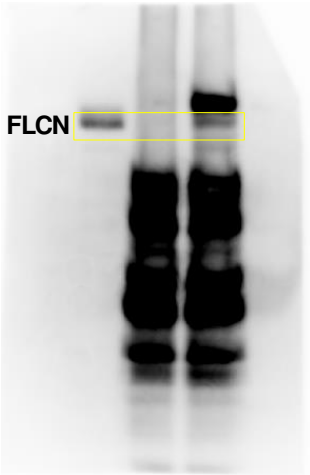

Full edited gel for Figure 5E-o23 IP-V5

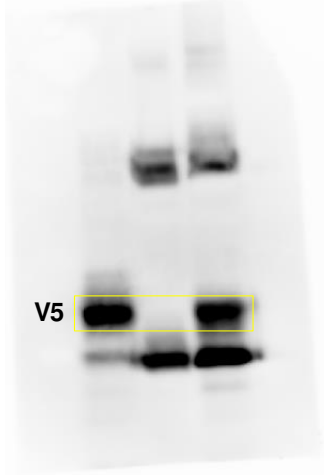

Full edited gel for Figure 5E-o23 IP-GAPDH

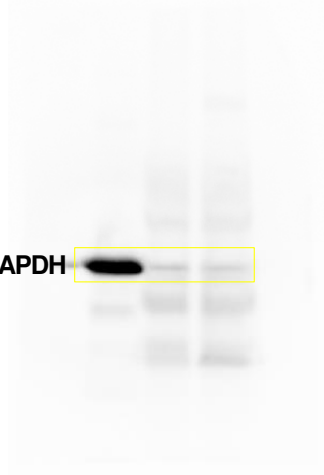

Full edited gel for Figure 5E-o41 IP-FLCN

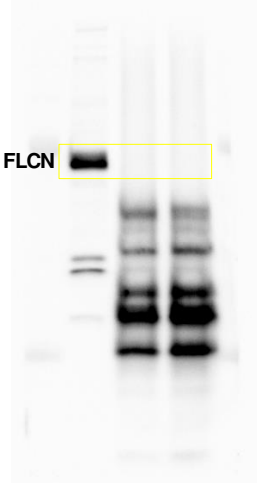

Full edited gel for Figure 5E-o41 IP-V5

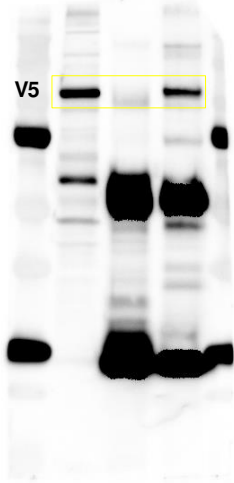

Full edited gel for Figure 5E-o41 IP-GAPDH

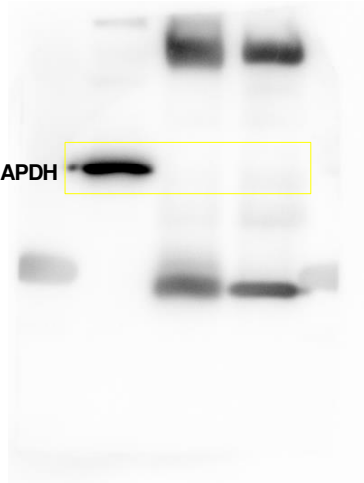

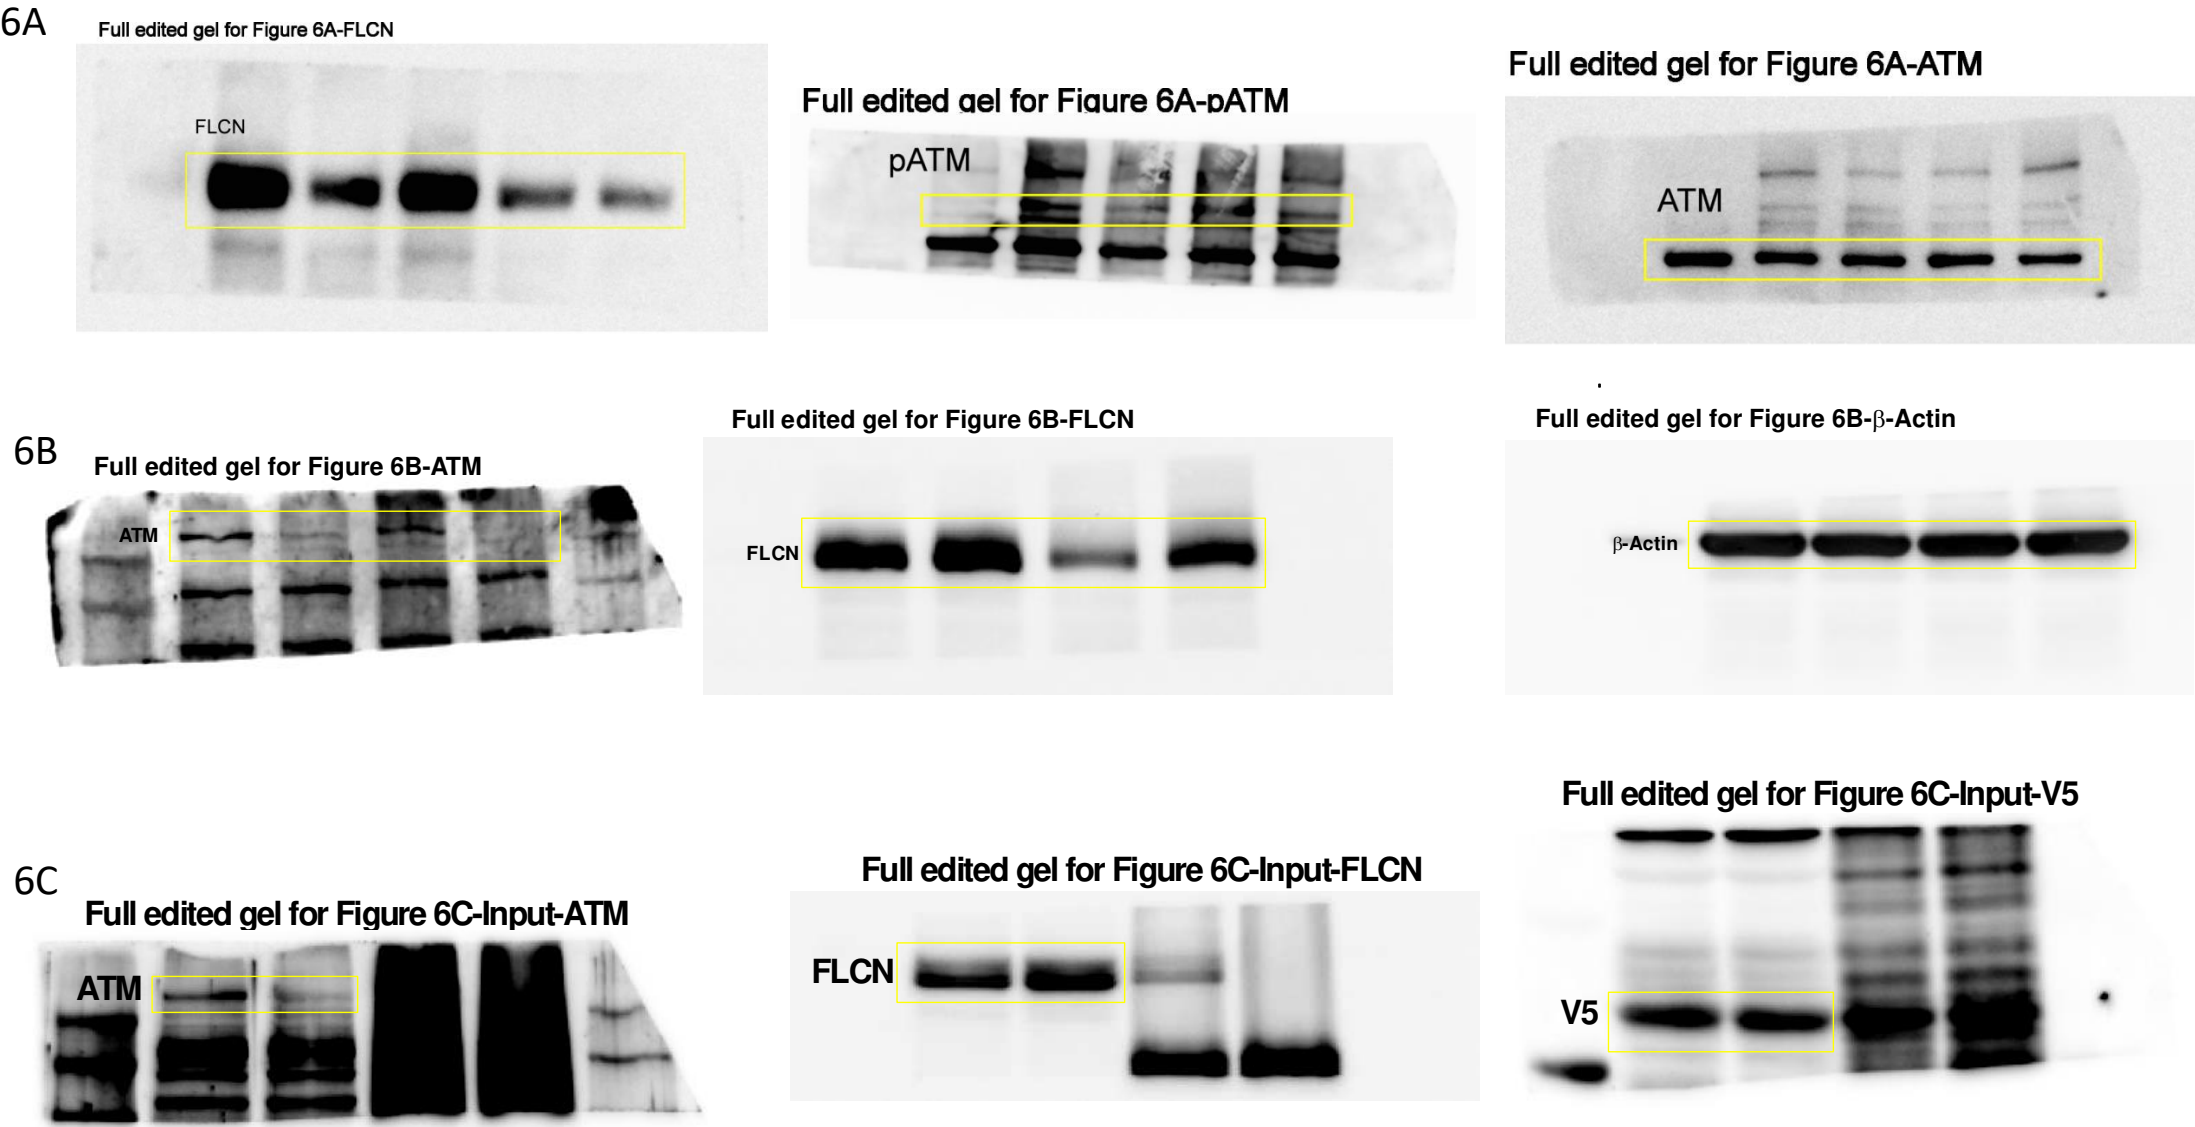

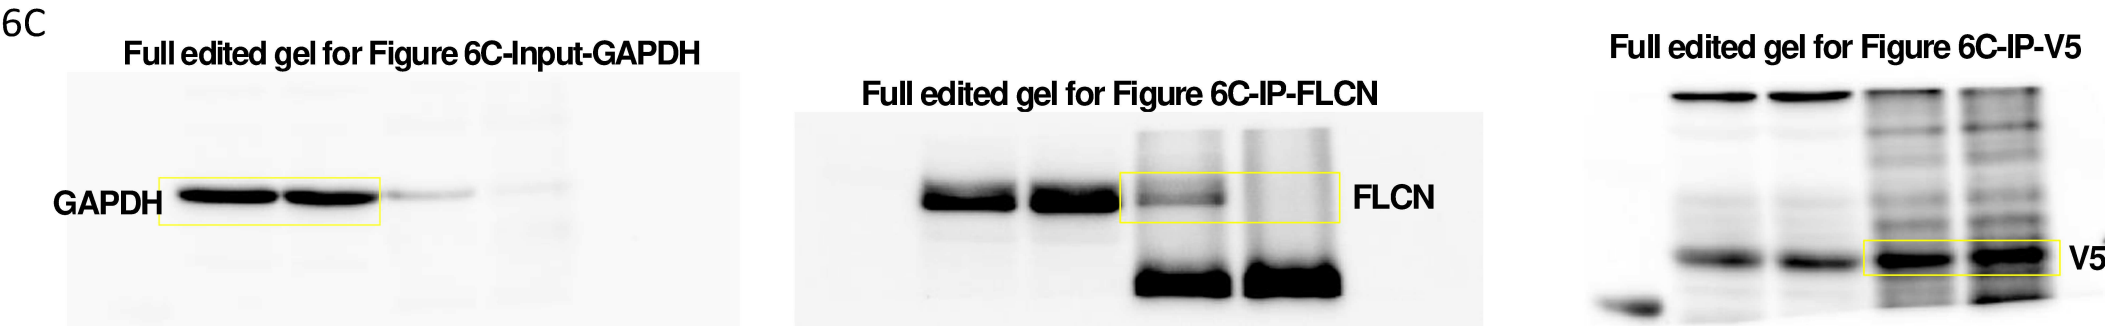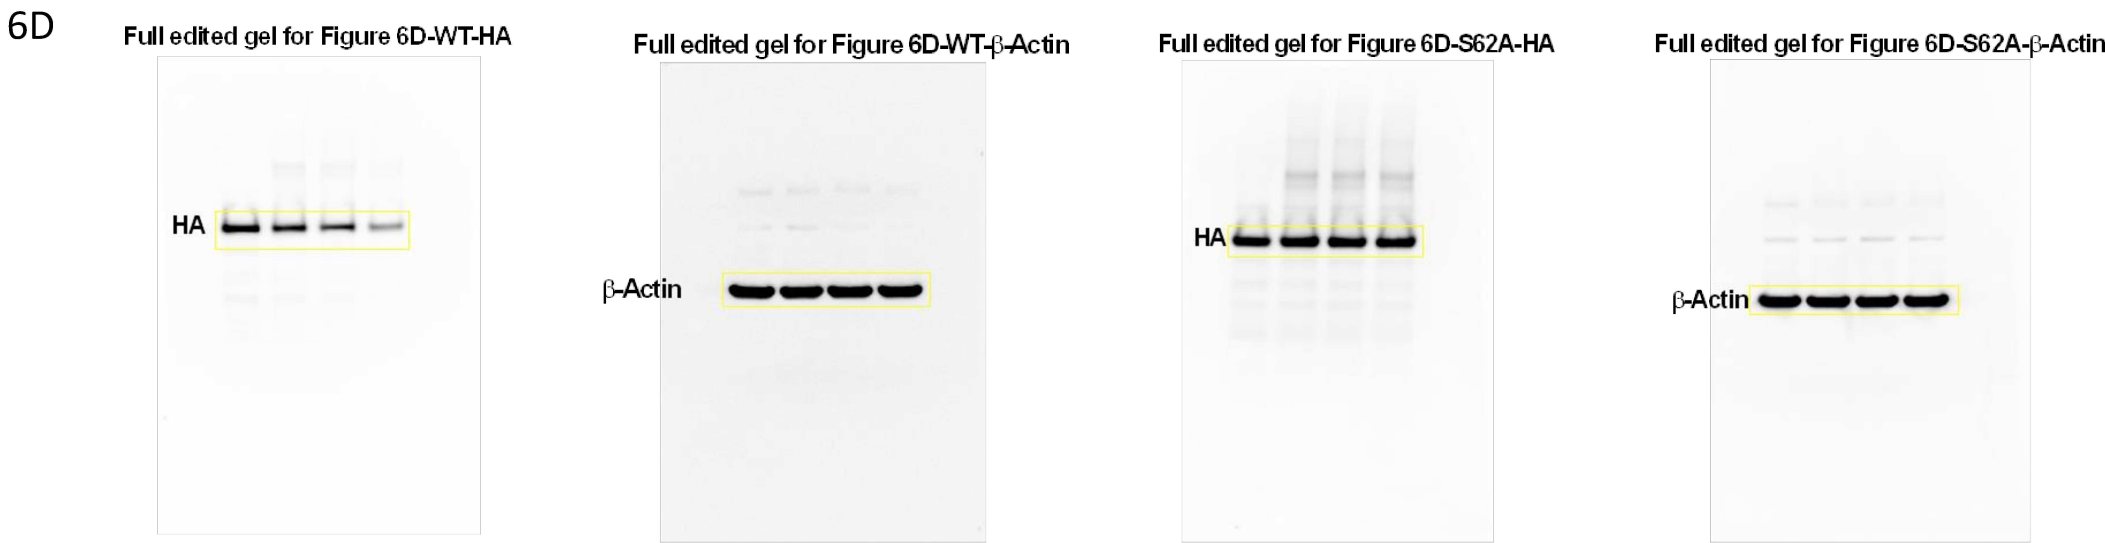

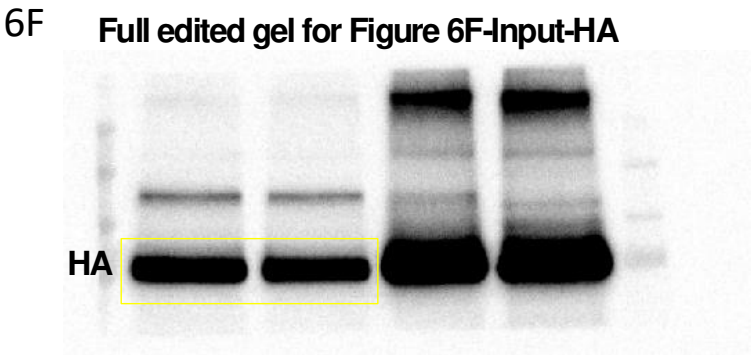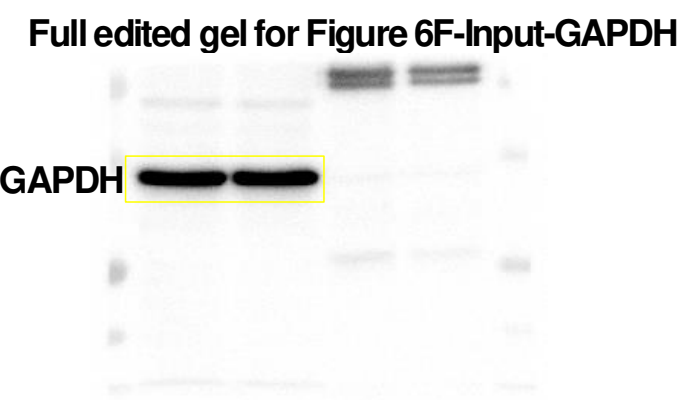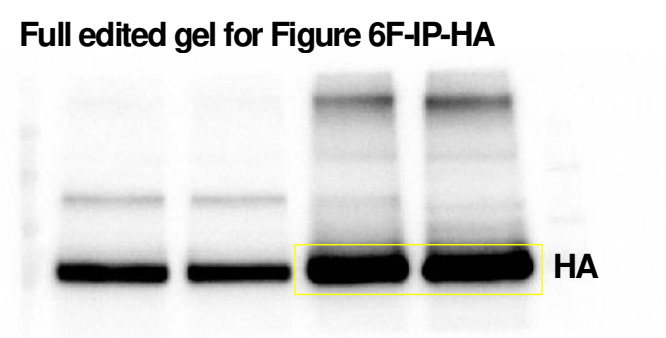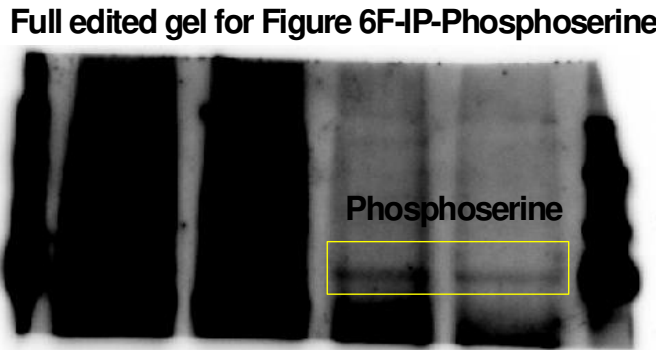

Supplemental Figure 1

Full edited gel for Supplemental Figure 1A-FLCN

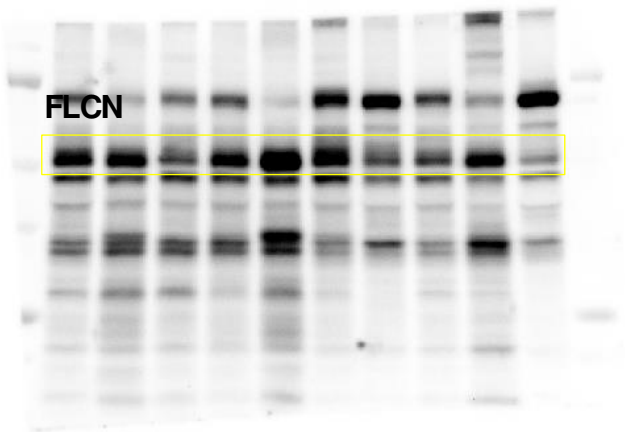

Full edited gel for Supplemental Figure 1A-HPRT1

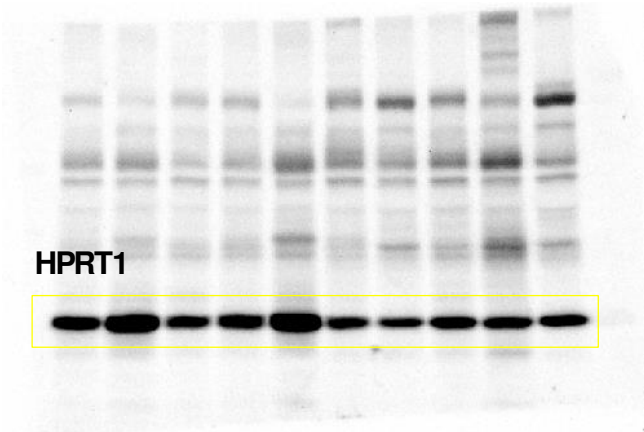

Full edited gel for Supplemental Figure 1C-FLCN

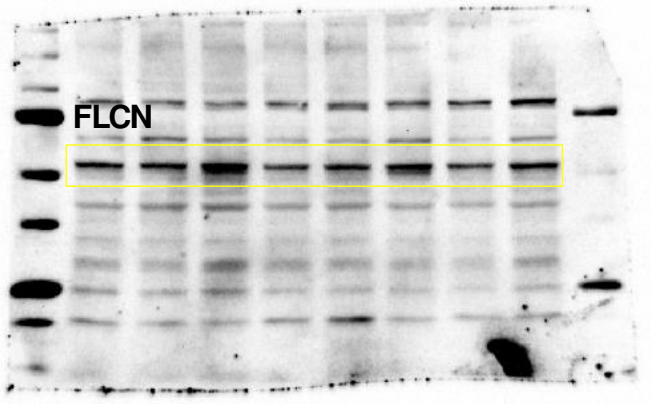

Full edited gel for Supplemental Figure 1C-β-Actin

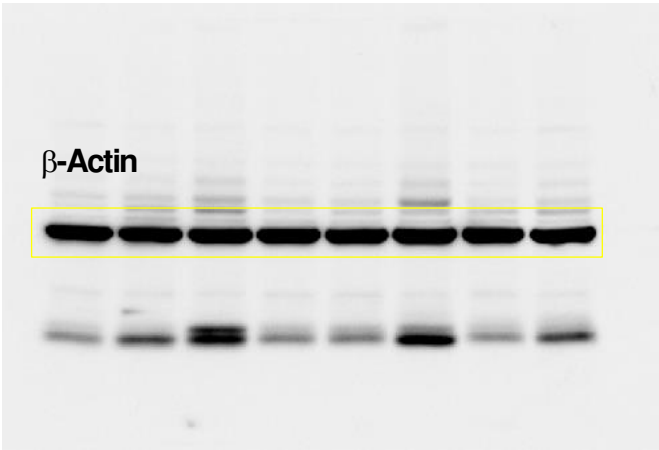

Supplemental Figure 2

Full edited gel for Supplemental Figure 2A-FLCN

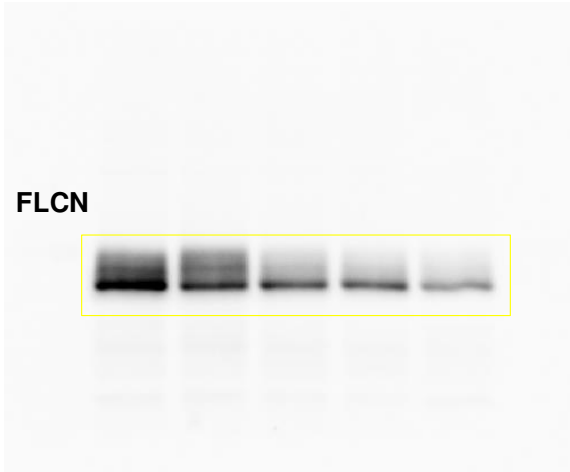

Full edited gel for Supplemental Figure 2A- $\alpha$ -Tubulin

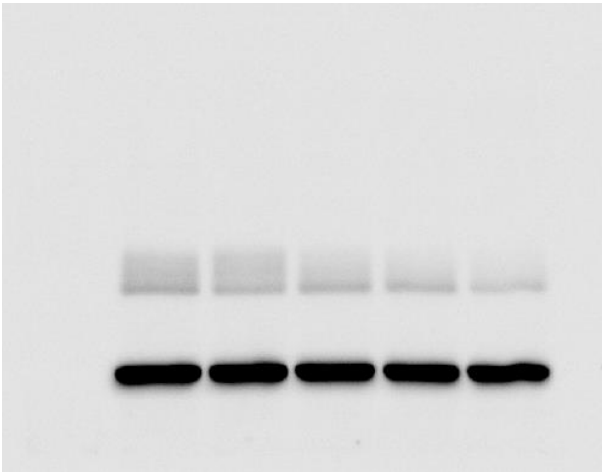

Supplement: thoraxjnl-2021-217197supp001_data_supplement.pdf [file thoraxjnl-2021-217197supp001_data_supplement.pdf]
