# Supplementary figures and images for: Cigarette smoking is a secondary cause of folliculin loss
Source: HighWire-hosted journal article supplement (doi:10.1136/thoraxjnl-2021-217197), 2022-03-17

## Supplemental Figure 1

A

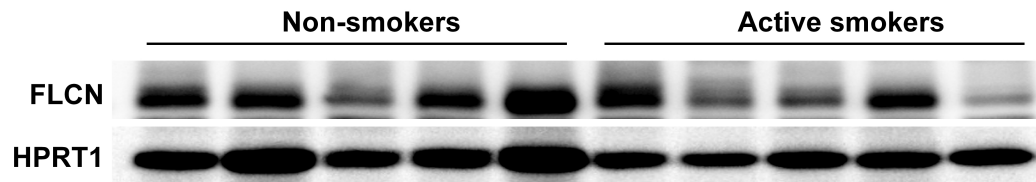

B

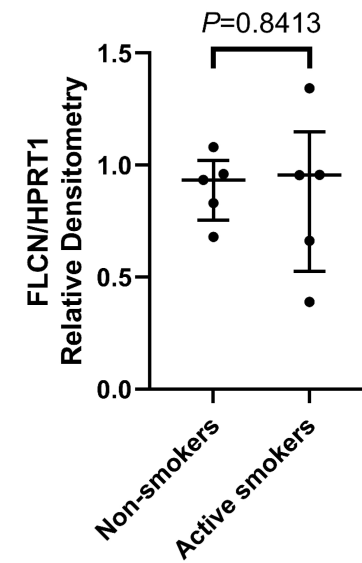

C

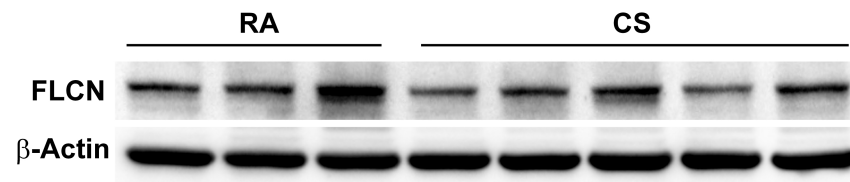

D

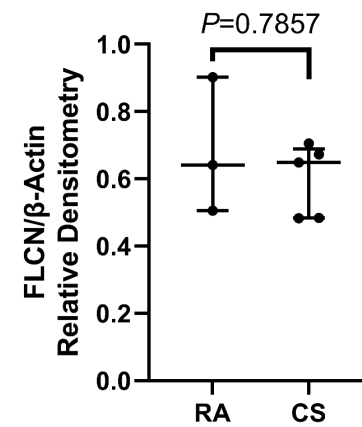

## Supplemental Figure 2

**A**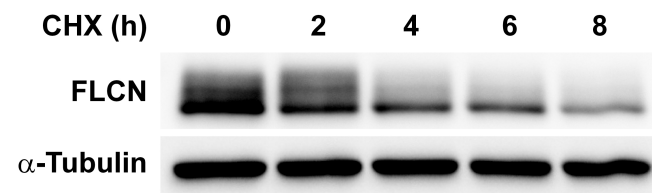**B**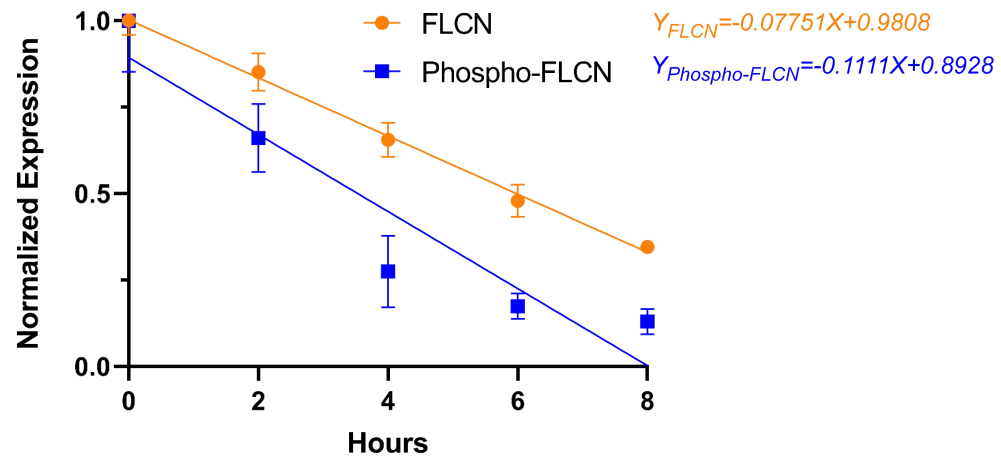

Supplement: thoraxjnl-2021-217197supp002_data_supplement.pdf [file thoraxjnl-2021-217197supp002_data_supplement.pdf]

## Supplemental Figure 1

**A**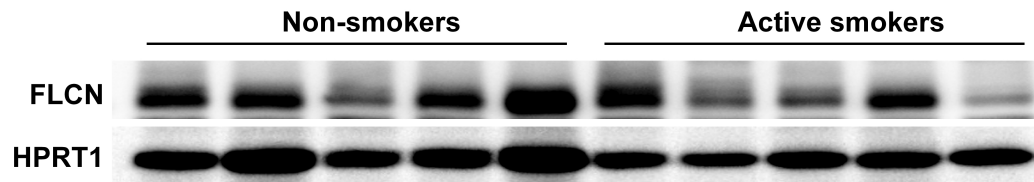**B****C****D**

## Supplemental Figure 2

**A**

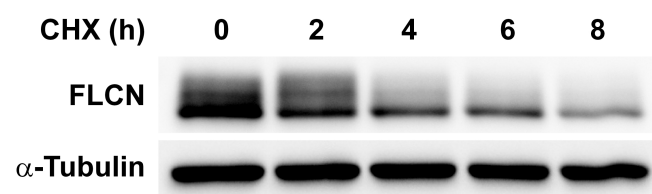

**B**

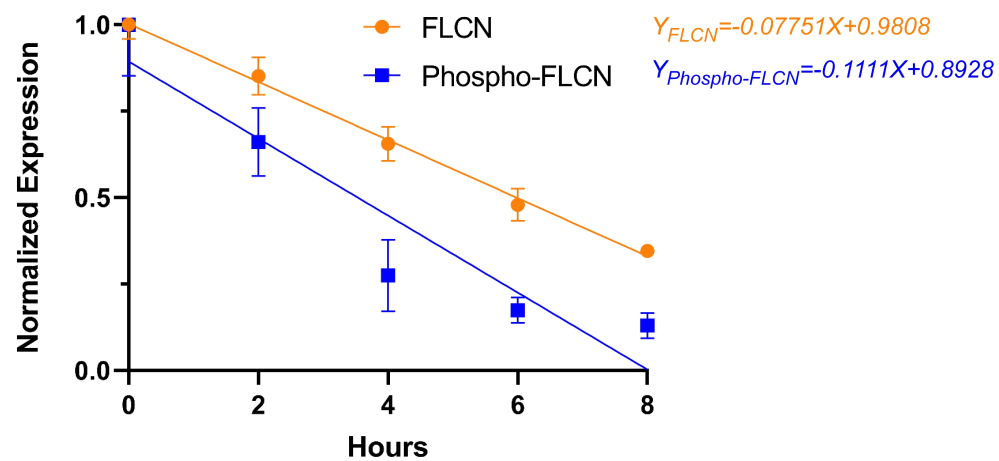

Supplement: thoraxjnl-2021-217197supp002_data_supplement.pdf [file thoraxjnl-2021-217197supp002_data_supplement.pdf]
